# Supplementary material for: Social Determinants of Health and Insurance Claim Denials for Preventive Care
Source: PubMed Central journal article supplement (PMC11411384; doi:10.1001/jamanetworkopen.2024.33316), 2024-09-18
Supplement: jamanetwopen-e2433316-s001.pdf [file jamanetwopen-e2433316-s001.pdf]

## Supplemental Online Content

Hoagland A, Yu O, Horný M. Social determinants of health and insurance claim denials for preventive care. *JAMA Netw Open*. 2024;7(9):e2433316.  
doi:10.1001/jamanetworkopen.2024.33316

**eTable 1.** List of Procedure and Diagnostic Codes Used to Identify Preventive Claims

**eTable 2.** List and Frequency of Claims Denials Reasons by Category

**eTable 3.** Conditional Patients' Financial Responsibility for Denied Preventive Claims

**eTable 4.** Robustness of Regression Results to Individual-Specific Random Effects

**eFigure 1.** Overall Denial Rates

**eFigure 2.** Robustness of Inclusion of All Same-Day Services

**eFigure 3.** Robustness of Exclusion of Wellness Visits

This supplemental material has been provided by the authors to give readers additional information about their work.

eTable 1: List of Procedure and Diagnostic Codes Used to Identify Preventive Claims

| Service Type                                    | CPT Procedure Codes                                                                                                                                                                                                                                                                                                                                                                                                                                          | Required Accompanying ICD-10-CM Diagnosis Codes                                                                                                                                                                                                                                                                                                                                                                                                                     |
|-------------------------------------------------|--------------------------------------------------------------------------------------------------------------------------------------------------------------------------------------------------------------------------------------------------------------------------------------------------------------------------------------------------------------------------------------------------------------------------------------------------------------|---------------------------------------------------------------------------------------------------------------------------------------------------------------------------------------------------------------------------------------------------------------------------------------------------------------------------------------------------------------------------------------------------------------------------------------------------------------------|
| Administration and management of contraceptives | 96372, 57170, 58340, 58565, 58600, 58605, 58611, 58615, 58670, 58671, 74740, A4261, A4264, A4266, 11976, 11981, 11982, 11983, 58300, 58301, J1050, J1051, J1055, J1056, J7302, J7306, J7307, S4981, S4989, J7300, Q0090, V2501, V2502, V2503, V2509, V2511, V2512, V2513, V2540, V2541, V2542, V2543, V2549, V255, V258, V259, Z30011, Z30012, Z30013, Z30014, Z30018, Z30019, Z3009, Z3040, Z3041, Z3042, Z30430, Z30431, Z30432, Z30433, Z3049, Z308, Z309 |                                                                                                                                                                                                                                                                                                                                                                                                                                                                     |
| Breast Cancer Screening                         | 77057, 77052, G0202, 77067, 77065, 77066, 76083, 76092                                                                                                                                                                                                                                                                                                                                                                                                       |                                                                                                                                                                                                                                                                                                                                                                                                                                                                     |
| Cholesterol Screening                           | 36415, 36416, 80061, 82465, 83718, 83719, 83721, 84478                                                                                                                                                                                                                                                                                                                                                                                                       | Z0000, Z0001, Z13220                                                                                                                                                                                                                                                                                                                                                                                                                                                |
| Colorectal Cancer Screening                     | 44388, 44389, 44392, 44393, 44394, 45300, 45301, 45302, 45303, 45304, 45305, 45306, 45307, 45308, 45309, 45310, 45311, 45312, 45313, 45314, 45315, 45316, 45317, 45318, 45319, 45320, 45330, 45331, 45332, 45333, 45334, 45335, 45338, 45339, 45340, 45378, 45379, 45380, 45381, 45382, 45383, 45384, 45385, 45386, 74263, 82270, 82274, 88304, 88305, G0104, G0105, G0106, G0107, G0120, G0121, G0122, G0328, G0394, S0601, S3890                           | Z0000, Z0001, Z1210, Z1211, Z1212, Z800, Z8371, Z8379                                                                                                                                                                                                                                                                                                                                                                                                               |
| Depression Screening                            | 96127, 96160, 96161, 99420, G0444                                                                                                                                                                                                                                                                                                                                                                                                                            | Z1389                                                                                                                                                                                                                                                                                                                                                                                                                                                               |
| Diabetes Screening                              | 36415, 36416, 82947, 82948, 82950, 82951, 82952, 83036                                                                                                                                                                                                                                                                                                                                                                                                       | Z0000, Z0001, Z131, I10, I110, I119, I120, I129, I130, I1310, I1311, I132, I150, I151, I152, I158, I159, N262, O10011, O10012, O10013, O10019, O1002, O1003, O10111, O10112, O10113, O10119, O1012, O1013, O10211, O10212, O10213, O10219, O1022, O1023, O10311, O10312, O10313, O10319, O1032, O1033, O10411, O10412, O10413, O10419, O1042, O1043, O10911, O10912, O10913, O10919, O1092, O1093, O111, O112, O113, O119, O131, O132, O139, O161, O162, O163, O169 |
| Wellness Visits                                 | 99201, 99202, 99203, 99204, 99205, 99211, 99212, 99213, 99214, 99215, 99381, 99382, 99383, 99384, 99388, 99389, 99390, 99391, 99392, 99393, 99394, 99401, 99402, 99403, 99404, 99411, 99412, 99461, G0101, G0344, G0402, G0438, G0439, G0445, S0610, S0612, S0613                                                                                                                                                                                            | Z0000, Z0001, Z00110, Z00111, Z00129                                                                                                                                                                                                                                                                                                                                                                                                                                |

eTable 2: List and Frequency of Claims Denials Reasons by Category

| <b>1. Alternative Coverage</b>     |                       |                                     |                                                                                                                      |
|------------------------------------|-----------------------|-------------------------------------|----------------------------------------------------------------------------------------------------------------------|
| Code                               | Frequency, All Claims | Frequency, Preventive Services Only | Description                                                                                                          |
| 19                                 | 391                   | 25                                  | This is a work-related injury/illness and thus the liability of the Worker's Compensation Carrier.                   |
| 20                                 | 68                    | 3                                   | This injury/illness is covered by the liability carrier.                                                             |
| 21                                 | 90                    | 5                                   | This injury/illness is the liability of the no-fault carrier.                                                        |
| 22                                 | 13,104                | 632                                 | This care may be covered by another payer per coordination of benefits.                                              |
| 23                                 | 104,306               | 3,131                               | The impact of prior payer(s) adjudication including payments and/or adjustments.                                     |
| 24                                 | 41,021                | 135                                 | Charges are covered under a capitation agreement/managed care plan.                                                  |
| 109                                | 3,407                 | 454                                 | Claim/service not covered by this payer/contractor. You must send the claim/service to the correct payer/contractor. |
| 169                                | 352                   | 5                                   | Alternate benefit has been provided.                                                                                 |
| <b>2. Specific Benefit Denials</b> |                       |                                     |                                                                                                                      |
| Code                               | Frequency, All Claims | Frequency, Preventive Services Only | Description                                                                                                          |
| 35                                 | 868                   | 33                                  | Lifetime benefit maximum has been reached.                                                                           |
| 39                                 | 80                    | 67                                  | Services denied at the time authorization/pre-certification was requested.                                           |
| 40                                 | 79                    | 5                                   | Charges do not meet qualifications for emergent/urgent care.                                                         |
| 46                                 | 4                     | 4                                   | This (these) service(s) is (are) not covered.                                                                        |
| 50                                 | 3,467                 | 2,752                               | These are non-covered services because this is not deemed a 'medical necessity' by the payer.                        |
| 51                                 | 63                    | 38                                  | These are non-covered services because this is a pre-existing condition.                                             |
| 54                                 | 91                    | 4                                   | Multiple physicians/assistants are not covered in this case.                                                         |
| 55                                 | 3,350                 | 2,611                               | Procedure/treatment is deemed experimental/investigational by the payer.                                             |
| 56                                 | 24                    | 22                                  | Procedure/treatment has not been deemed 'proven to be effective' by the payer.                                       |
| 58                                 | 424                   | 58                                  | Treatment was deemed by the payer to have been rendered in an inappropriate or invalid place of service.             |
| 95                                 | 1,426                 | 69                                  | Plan procedures not followed.                                                                                        |
| 96                                 | 43,971                | 2,836                               | Non-covered charge(s).                                                                                               |
| 119                                | 9,610                 | 891                                 | Benefit maximum for this time period or occurrence has been reached.                                                 |
| 149                                | 30                    | 1                                   | Lifetime benefit maximum has been reached for this service/benefit category.                                         |
| 150                                | 685                   | 46                                  | Payer deems the information submitted does not support this level of service.                                        |
| 151                                | 832                   | 117                                 | Payment adjusted because the payer deems the information submitted does not support this many/frequency of services. |
| 160                                | 435                   | 140                                 | Injury/illness was the result of an activity that is a benefit exclusion.                                            |
| 165                                | 395                   | 19                                  | Referral absent or exceeded.                                                                                         |
| 167                                | 2,101                 | 271                                 | This (these) diagnosis(es) is (are) not covered.                                                                     |
| 170                                | 568                   | 46                                  | Payment is denied when performed/billed by this type of provider.                                                    |
| 171                                | 154                   | 16                                  | Payment is denied when performed/billed by this type of provider in this type of facility.                           |

|     |       |       |                                                                                                                                                                        |
|-----|-------|-------|------------------------------------------------------------------------------------------------------------------------------------------------------------------------|
| 172 | 25    | 21    | Payment is adjusted when performed/billed by a provider of this specialty.                                                                                             |
| 177 | 182   | 30    | Patient has not met the required eligibility requirements.                                                                                                             |
| 197 | 5,112 | 1,003 | Precertification/authorization/notification absent.                                                                                                                    |
| 198 | 47    | 12    | Precertification/authorization exceeded.                                                                                                                               |
| 204 | 9,693 | 7,183 | This service/equipment/drug is not covered under the patient's current benefit plan                                                                                    |
| 227 | 9,055 | 400   | Information requested from the patient/insured/responsible party was not provided or was insufficient/incomplete.                                                      |
| 231 | 3,067 | 153   | Mutually exclusive procedures cannot be done in the same day/setting.                                                                                                  |
| 242 | 4,011 | 268   | Services not provided by network/primary care providers.                                                                                                               |
| 256 | 1,282 | 86    | Service not payable per managed care contract.                                                                                                                         |
| 272 | 445   | 16    | Coverage/program guidelines were not met.                                                                                                                              |
| 273 | 386   | 33    | Coverage/program guidelines were exceeded.                                                                                                                             |
| B1  | 1,136 | 47    | Non-covered visits.                                                                                                                                                    |
| B15 | 8,996 | 460   | This service/procedure requires that a qualifying service/procedure be received and covered. The qualifying other service/procedure has not been received/adjudicated. |
| B5  | 383   | 22    | Coverage/program guidelines were not met or were exceeded.                                                                                                             |

### 3. Billing Errors

| Code | Frequency, All Claims | Frequency, Preventive Services Only | Description                                                                                                                                                   |
|------|-----------------------|-------------------------------------|---------------------------------------------------------------------------------------------------------------------------------------------------------------|
| 4    | 7,023                 | 785                                 | The procedure code is inconsistent with the modifier used or a required modifier is missing.                                                                  |
| 5    | 656                   | 97                                  | The procedure code/bill type is inconsistent with the place of service.                                                                                       |
| 6    | 1,586                 | 162                                 | The procedure/revenue code is inconsistent with the patient's age.                                                                                            |
| 7    | 48                    | 9                                   | The procedure/revenue code is inconsistent with the patient's gender.                                                                                         |
| 8    | 432                   | 6                                   | The procedure code is inconsistent with the provider type/specialty (taxonomy).                                                                               |
| 9    | 129                   | 16                                  | The diagnosis is inconsistent with the patient's age.                                                                                                         |
| 10   | 134                   | 11                                  | The diagnosis is inconsistent with the patient's gender.                                                                                                      |
| 11   | 4,326                 | 3,187                               | The diagnosis is inconsistent with the procedure.                                                                                                             |
| 12   | 3                     | 3                                   | The diagnosis is inconsistent with the provider type.                                                                                                         |
| 15   | 351                   | 45                                  | The authorization number is missing, invalid, or does not apply to the billed services or provider.                                                           |
| 16   | 15,445                | 1,751                               | Claim/service lacks information or has submission/billing error(s) which is needed for adjudication.                                                          |
| 29   | 15,100                | 1,946                               | The time limit for filing has expired.                                                                                                                        |
| 47   | 8                     | 8                                   | This (these) diagnosis(es) is (are) not covered, missing, or are invalid.                                                                                     |
| 49   | 3,126                 | 2,437                               | This is a non-covered service because it is a routine/preventive exam or a diagnostic/screening procedure done in conjunction with a routine/preventive exam. |
| 59   | 24,479                | 197                                 | Processed based on multiple or concurrent procedure rules. (For example multiple surgery or diagnostic imaging, concurrent anesthesia.)                       |
| 102  | 491                   | 41                                  | Major Medical Adjustment.                                                                                                                                     |

|     |        |       |                                                                                                                                                                                                                                                                                |
|-----|--------|-------|--------------------------------------------------------------------------------------------------------------------------------------------------------------------------------------------------------------------------------------------------------------------------------|
| 107 | 139    | 24    | The related or qualifying claim/service was not identified on this claim.                                                                                                                                                                                                      |
| 111 | 15     | 1     | Not covered unless the provider accepts assignment.                                                                                                                                                                                                                            |
| 125 | 92     | 6     | Submission/billing error(s).                                                                                                                                                                                                                                                   |
| 129 | 5,263  | 842   | Prior processing information appears incorrect.                                                                                                                                                                                                                                |
| 140 | 66     | 1     | Patient/Insured health identification number and name do not match.                                                                                                                                                                                                            |
| 146 | 176    | 40    | Diagnosis was invalid for the date(s) of service reported.                                                                                                                                                                                                                     |
| 147 | 105    | 15    | Provider contracted/negotiated rate expired or not on file.                                                                                                                                                                                                                    |
| 148 | 29     | 5     | Information from another provider was not provided or was insufficient/incomplete.                                                                                                                                                                                             |
| 163 | 681    | 31    | Attachment/other documentation referenced on the claim was not received.                                                                                                                                                                                                       |
| 164 | 120    | 60    | Attachment/other documentation referenced on the claim was not received in a timely fashion.                                                                                                                                                                                   |
| 181 | 117    | 38    | Procedure code was invalid on the date of service.                                                                                                                                                                                                                             |
| 182 | 152    | 46    | Procedure modifier was invalid on the date of service.                                                                                                                                                                                                                         |
| 183 | 16     | 2     | The referring provider is not eligible to refer the service billed.                                                                                                                                                                                                            |
| 185 | 1,224  | 17    | The rendering provider is not eligible to perform the service billed.                                                                                                                                                                                                          |
| 189 | 39     | 13    | 'Not otherwise classified' or 'unlisted' procedure code (CPT/HCPCS) was billed when there is a specific procedure code for this procedure/service                                                                                                                              |
| 206 | 439    | 59    | National Provider Identifier – missing.                                                                                                                                                                                                                                        |
| 208 | 242    | 39    | National Provider Identifier – Not matched.                                                                                                                                                                                                                                    |
| 210 | 74     | 18    | Payment adjusted because pre-certification/authorization not received in a timely fashion                                                                                                                                                                                      |
| 222 | 2,534  | 141   | Exceeds the contracted maximum number of hours/days/units by this provider for this period.<br>This is not patient specific.                                                                                                                                                   |
| 226 | 2,442  | 286   | Information requested from the Billing/Rendering Provider was not provided or not provided timely or was insufficient/incomplete.                                                                                                                                              |
| 236 | 1,987  | 348   | This procedure or procedure/modifier combination is not compatible with another procedure or procedure/modifier combination provided on the same day according to the National Correct Coding Initiative or workers compensation state regulations/ fee schedule requirements. |
| 243 | 484    | 151   | Services not authorized by network/primary care providers.                                                                                                                                                                                                                     |
| 250 | 126    | 8     | The attachment/other documentation that was received was the incorrect attachment/document.<br>The expected attachment/document is still missing.                                                                                                                              |
| 251 | 294    | 32    | The attachment/other documentation that was received was incomplete or deficient. The necessary information is still needed to process the claim.                                                                                                                              |
| 252 | 13,923 | 1,130 | An attachment/other documentation is required to adjudicate this claim/service.                                                                                                                                                                                                |
| B12 | 285    | 100   | Services not documented in patients' medical records.                                                                                                                                                                                                                          |
| B14 | 511    | 21    | Only one visit or consultation per physician per day is covered.                                                                                                                                                                                                               |
| B16 | 1,608  | 87    | 'New Patient' qualifications were not met.                                                                                                                                                                                                                                     |
| B20 | 3,127  | 9     | Procedure/service was partially or fully furnished by another provider.                                                                                                                                                                                                        |

|     |       |    |                                                                                                                |
|-----|-------|----|----------------------------------------------------------------------------------------------------------------|
| B23 | 13    | 1  | Procedure billed is not authorized per your Clinical Laboratory Improvement Amendment (CLIA) proficiency test. |
| B7  | 4,489 | 49 | This provider was not certified/eligible to be paid for this procedure/service on this date of service.        |

#### 4. Coverage Lapses

| Code | Frequency, All Claims | Frequency, Preventive Services Only | Description                                                                                                  |
|------|-----------------------|-------------------------------------|--------------------------------------------------------------------------------------------------------------|
| 26   | 1,976                 | 262                                 | Expenses incurred prior to coverage.                                                                         |
| 27   | 11,974                | 864                                 | Expenses incurred after coverage terminated.                                                                 |
| 31   | 3,104                 | 757                                 | Patient cannot be identified as our insured.                                                                 |
| 32   | 576                   | 95                                  | Our records indicate that this dependent is not an eligible dependent as defined.                            |
| 33   | 868                   | 37                                  | Insured has no dependent coverage.                                                                           |
| 53   | 77                    | 1                                   | Services by an immediate relative or a member of the same household are not covered.                         |
| 136  | 678                   | 133                                 | Failure to follow prior payer's coverage rules. (Use only with Group Code OA)                                |
| 141  | 27                    | 3                                   | Claim spans eligible and ineligible periods of coverage.                                                     |
| 166  | 34                    | 5                                   | These services were submitted after this payer's responsibility for processing claims under this plan ended. |
| 200  | 1,283                 | 497                                 | Expenses incurred during lapse in coverage                                                                   |
| 239  | 4                     | 3                                   | Claim spans eligible and ineligible periods of coverage. Rebill separate claims.                             |
| 106  | 29                    | 2                                   | Patient payment option/election not in effect.                                                               |

#### 5. Other Denials

| Code | Frequency, All Claims | Frequency, Preventive Services Only | Description                                                                                                                  |
|------|-----------------------|-------------------------------------|------------------------------------------------------------------------------------------------------------------------------|
| 60   | 2                     | 1                                   | Charges for outpatient services are not covered when performed within a period of time prior to or after inpatient services. |
| A1   | 148,548               | 745                                 | Claim/Service denied.                                                                                                        |
| B9   | 200                   | 14                                  | Patient is enrolled in a Hospice.                                                                                            |

*Note:* Table frequencies are calculated at the date-of-service level and indicate the number of observed denial codes among all denied claims (column 2; n=407,731) and among only denied preventive claims (column 3; n=33,564). Note that each denied claim may have more than one denial code attached to it.

Table 3: Conditional Patients' Financial Responsibility for Denied Preventive Claims

|                                  | <i>N</i> Claims | % > 0  | Min | Median | Mean    | Max       | SD      |
|----------------------------------|-----------------|--------|-----|--------|---------|-----------|---------|
| <b>Patient Groups</b>            |                 |        |     |        |         |           |         |
| All Patients                     | 61,785          | 92.85% | \$0 | \$385  | \$1,395 | \$243,747 | \$5,612 |
| <i>Household Income (\$000s)</i> |                 |        |     |        |         |           |         |
| <\$30                            | 10,539          | 93.25% | \$0 | \$412  | \$1,411 | \$196,514 | \$5,715 |
| \$30-49                          | 6,951           | 93.58% | \$0 | \$390  | \$1,654 | \$139,643 | \$6,374 |
| \$50-74                          | 8,184           | 92.74% | \$0 | \$354  | \$1,389 | \$243,747 | \$5,928 |
| \$75-99                          | 7,281           | 92.39% | \$0 | \$364  | \$1,383 | \$242,675 | \$5,609 |
| >=\$100                          | 11,588          | 92.98% | \$0 | \$365  | \$1,426 | \$240,493 | \$5,968 |
| <i>Patient Education</i>         |                 |        |     |        |         |           |         |
| High School or Less              | 14,860          | 93.63% | \$0 | \$384  | \$1,397 | \$196,514 | \$5,672 |
| Some College                     | 19,515          | 92.43% | \$0 | \$364  | \$1,441 | \$243,747 | \$5,856 |
| Associate degree or Higher       | 9,694           | 93.12% | \$0 | \$399  | \$1,485 | \$242,675 | \$6,239 |
| <i>Race and Ethnicity</i>        |                 |        |     |        |         |           |         |
| Non-Hispanic White               | 29,765          | 92.85% | \$0 | \$357  | \$1,467 | \$243,747 | \$6,104 |
| Non-Hispanic Black               | 7,658           | 93.24% | \$0 | \$390  | \$1,632 | \$242,675 | \$6,396 |
| Hispanic                         | 4,971           | 93.34% | \$0 | \$464  | \$1,161 | \$196,514 | \$4,708 |
| Asian                            | 888             | 94.03% | \$0 | \$522  | \$1,301 | \$46,032  | \$4,121 |
| Other                            | 651             | 92.78% | \$0 | \$391  | \$1,084 | \$31,912  | \$2,858 |

*Notes:* Distribution of unpaid portion of denied claims for preventive services, as defined using eTable 1. Claims include preventive services as well as any additional services consumed by the patient at the same provider on a given day; claims are then aggregated to the patient-provider-service day level. Unpaid portion of claims is measured as the total charges for the denied claim minus any amount paid by the plan and are adjusted to be in 2024 USD.

Table 4: Robustness of Regression Results to Individual-Specific Random Effects

|                                                                 | Any Claim Denial, OR [95% CI] |                    |                 | Specific Benefit Denial, OR [95% CI] |                    |                 | Billing Error Denial, OR [95% CI] |                    |                 |
|-----------------------------------------------------------------|-------------------------------|--------------------|-----------------|--------------------------------------|--------------------|-----------------|-----------------------------------|--------------------|-----------------|
|                                                                 | Primary Specification         | First Service Only | 50% Sample + RE | Primary Specification                | First Service Only | 50% Sample + RE | Primary Specification             | First Service Only | 50% Sample + RE |
| Patient Household Income (reference group: >\$100,00 annually)  |                               |                    |                 |                                      |                    |                 |                                   |                    |                 |
| <\$30,000                                                       | 1.430***                      | 1.512***           | 1.751***        | 1.533***                             | 1.609***           | 1.899***        | 1.160***                          | 1.236***           | 1.277***        |
|                                                                 | (1.366 - 1.497)               | (1.427 - 1.602)    | (1.586 - 1.933) | (1.440 - 1.633)                      | (1.481 - 1.748)    | (1.649 - 2.187) | (1.076 - 1.250)                   | (1.126 - 1.356)    | (1.110 - 1.469) |
| \$30,000–\$49,999                                               | 1.264***                      | 1.355***           | 1.424***        | 1.281***                             | 1.410***           | 1.508***        | 1.103**                           | 1.141***           | 1.124           |
|                                                                 | (1.204 - 1.327)               | (1.274 - 1.442)    | (1.281 - 1.583) | (1.196 - 1.371)                      | (1.290 - 1.541)    | (1.297 - 1.755) | (1.019 - 1.194)                   | (1.034 - 1.259)    | (0.969 - 1.305) |
| \$50,000–\$74,999                                               | 1.161***                      | 1.213***           | 1.280***        | 1.245***                             | 1.285***           | 1.415***        | 0.995                             | 1.057              | 1.054           |
|                                                                 | (1.109 - 1.216)               | (1.144 - 1.287)    | (1.160 - 1.412) | (1.169 - 1.326)                      | (1.182 - 1.396)    | (1.232 - 1.626) | (0.922 - 1.074)                   | (0.962 - 1.162)    | (0.917 - 1.213) |
| \$75,000–\$99,999                                               | 1.109***                      | 1.136***           | 1.157***        | 1.195***                             | 1.204***           | 1.292***        | 0.990                             | 1.038              | 1.003           |
|                                                                 | (1.058 - 1.162)               | (1.071 - 1.206)    | (1.048 - 1.277) | (1.122 - 1.273)                      | (1.108 - 1.309)    | (1.125 - 1.484) | (0.915 - 1.071)                   | (0.943 - 1.143)    | (0.870 - 1.157) |
| Patient Education (reference group: Associate degree or higher) |                               |                    |                 |                                      |                    |                 |                                   |                    |                 |
| <= High School                                                  | 0.992                         | 1.000              | 0.982           | 0.960                                | 1.000              | 0.935           | 1.039                             | 1.015              | 1.036           |
|                                                                 | (0.949 - 1.037)               | (0.945 - 1.059)    | (0.892 - 1.082) | (0.902 - 1.020)                      | (0.922 - 1.083)    | (0.815 - 1.073) | (0.965 - 1.118)                   | (0.926 - 1.111)    | (0.902 - 1.190) |
| Some College                                                    | 0.958**                       | 0.948**            | 0.925*          | 0.904***                             | 0.893***           | 0.866**         | 1.040                             | 1.006              | 1.017           |



|                                                                       |                    |                    |                    |                    |                    |                    |                    |                    |                    |
|-----------------------------------------------------------------------|--------------------|--------------------|--------------------|--------------------|--------------------|--------------------|--------------------|--------------------|--------------------|
|                                                                       | (0.921 -<br>0.996) | (0.902 -<br>0.996) | (0.851 -<br>1.005) | (0.857 -<br>0.952) | (0.833 -<br>0.957) | (0.770 -<br>0.972) | (0.973 -<br>1.111) | (0.927 -<br>1.090) | (0.901 -<br>1.147) |
| Patient Race/Ethnicity (reference group: Non-Hispanic White patients) |                    |                    |                    |                    |                    |                    |                    |                    |                    |
| Asian                                                                 | 1.537***           | 1.430***           | 1.805***           | 1.939***           | 1.749***           | 2.223***           | 1.143              | 1.166              | 1.327*             |
|                                                                       | (1.392 -<br>1.697) | (1.258 -<br>1.625) | (1.426 -<br>2.283) | (1.707 -<br>2.203) | (1.472 -<br>2.078) | (1.606 -<br>3.076) | (0.969 -<br>1.347) | (0.954 -<br>1.426) | (0.953 -<br>1.849) |
| Hispanic                                                              | 1.158***           | 1.214***           | 1.313***           | 1.302***           | 1.363***           | 1.458***           | 1.015              | 1.092*             | 1.151*             |
|                                                                       | (1.101 -<br>1.218) | (1.139 -<br>1.293) | (1.171 -<br>1.471) | (1.214 -<br>1.397) | (1.247 -<br>1.491) | (1.241 -<br>1.714) | (0.938 -<br>1.098) | (0.991 -<br>1.203) | (0.984 -<br>1.345) |
| Non-Hispanic Black                                                    | 1.191***           | 1.148***           | 1.178***           | 1.214***           | 1.129***           | 1.203***           | 1.147***           | 1.157***           | 1.085**            |
|                                                                       | (1.145 -<br>1.239) | (1.090 -<br>1.209) | (1.076 -<br>1.290) | (1.147 -<br>1.285) | (1.046 -<br>1.220) | (1.056 -<br>1.371) | (1.077 -<br>1.222) | (1.068 -<br>1.253) | (1.031 -<br>1.229) |
| Other                                                                 | 0.892*             | 0.917              | 0.756**            | 0.797**            | 0.749**            | 0.739              | 0.953              | 1.001              | 0.749              |
|                                                                       | (0.793 -<br>1.004) | (0.794 -<br>1.059) | (0.580 -<br>0.985) | (0.667 -<br>0.954) | (0.594 -<br>0.945) | (0.502 -<br>1.088) | (0.801 -<br>1.133) | (0.816 -<br>1.228) | (0.519 -<br>1.081) |

*Table Notes:* Table presents regression coefficients for each of the three models discussed in the Methods section of the main text, with alternative specifications showing robustness of results after accommodating potentially correlated claims for individuals with multiple encounters. “Primary specification” refers to the main regression presented in Table 2; “First Service Only” subsets the data by including only the first claim per individual in the regression; and “50% Sample + RE” uses a 50% random sample of individuals in the data for regression, and adds an individual-specific random effect to regression adjustment.

eFigure 1: Overall Denial Rates (compare to Figure 1 in the main text)

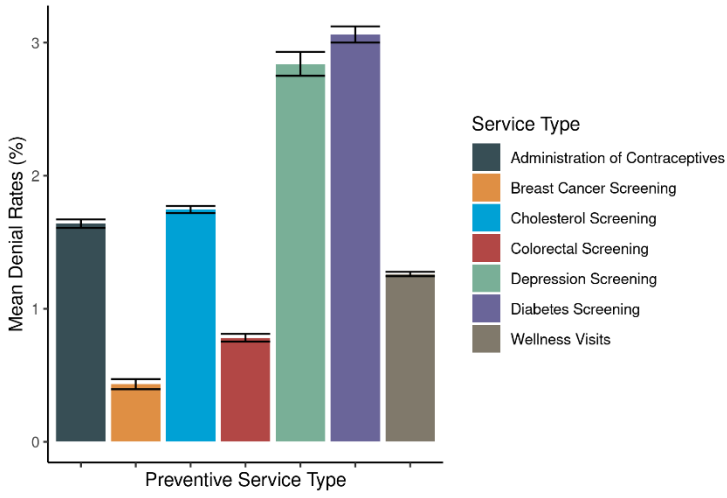

(a) All Services, by Type

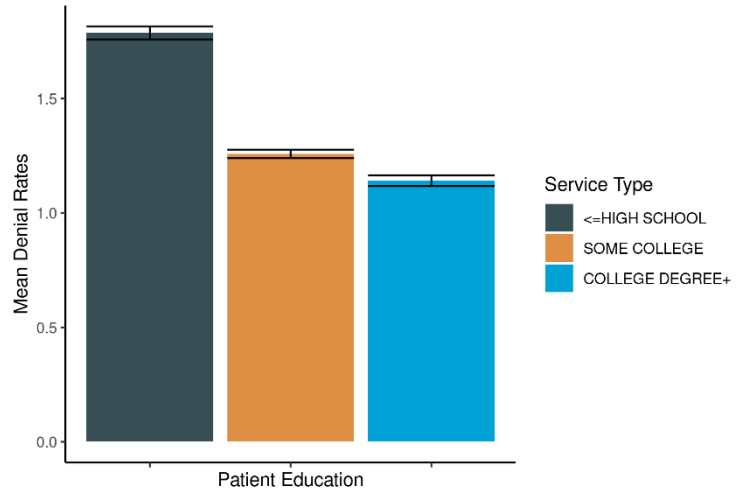

(b) Patient Education

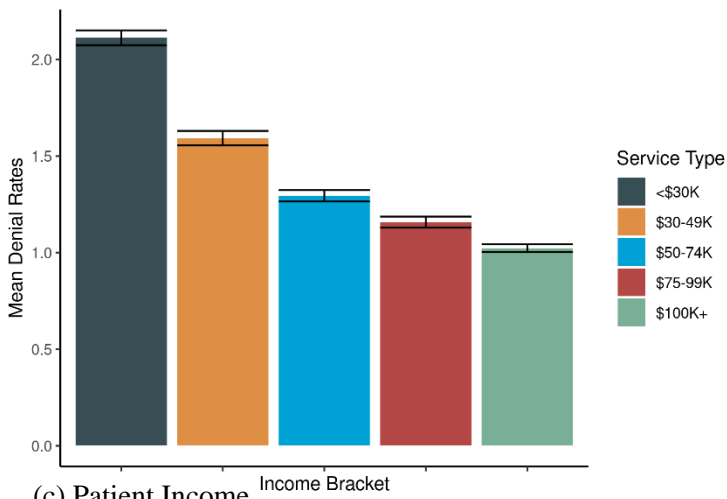

(c) Patient Income

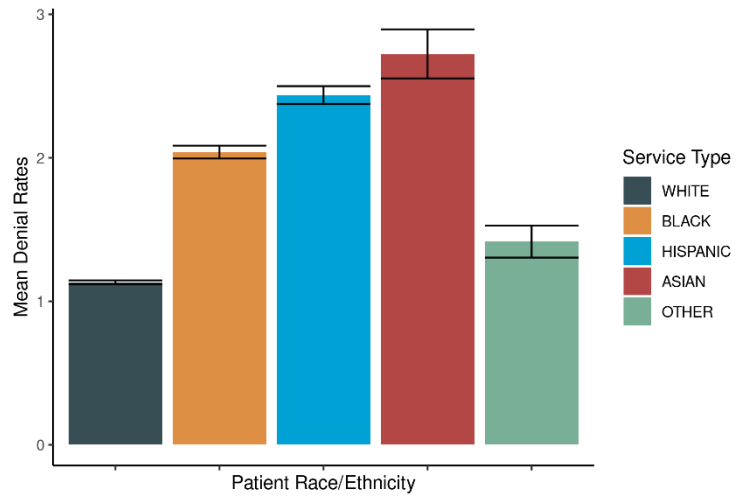

(d) Patient Race and Ethnicity

eFigure 2: Robustness of Inclusion of All Same-Day Services

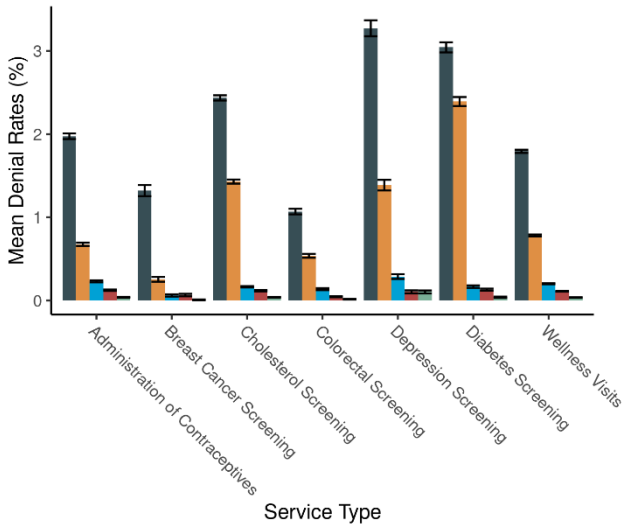

(a) Service Type

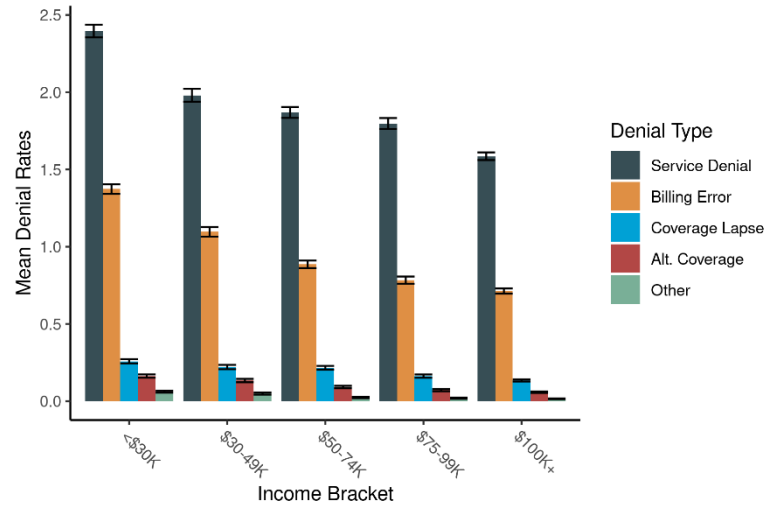

(b) Household Income Quintile

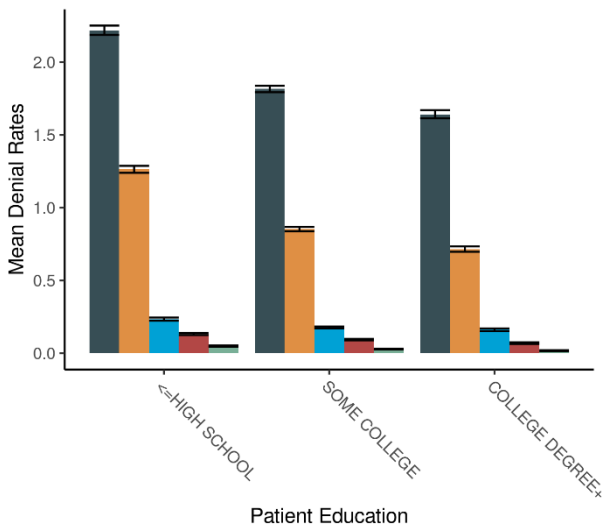

(c) Patient Education

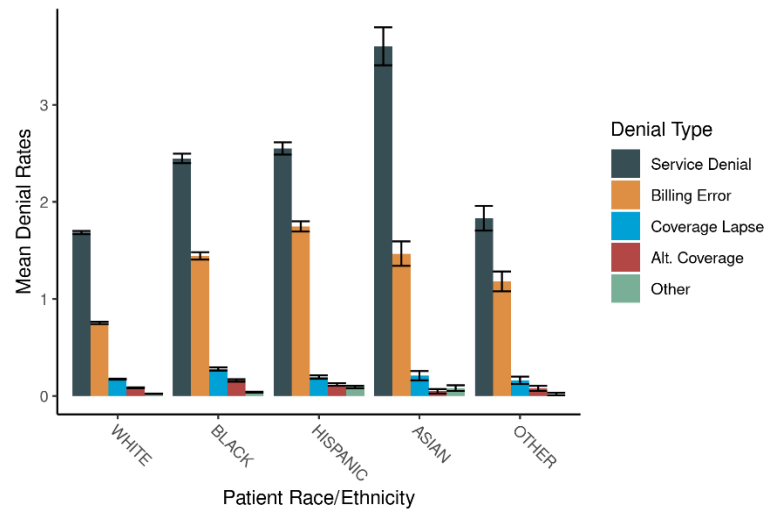

(d) Patient Race and Ethnicity

eFigure 3: Robustness of Exclusion of Wellness Visits

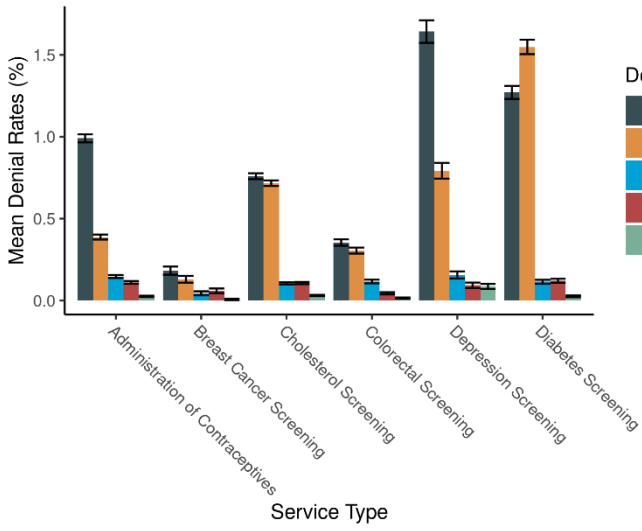

(d) Service Type

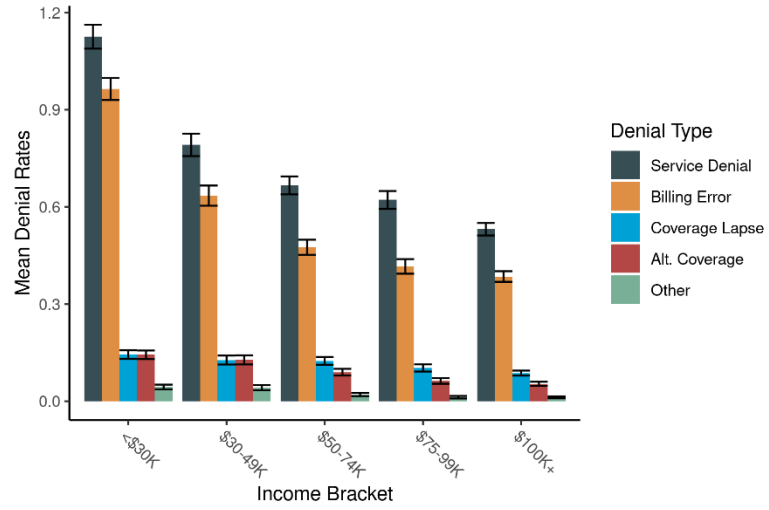

(a) Household Income Quintile

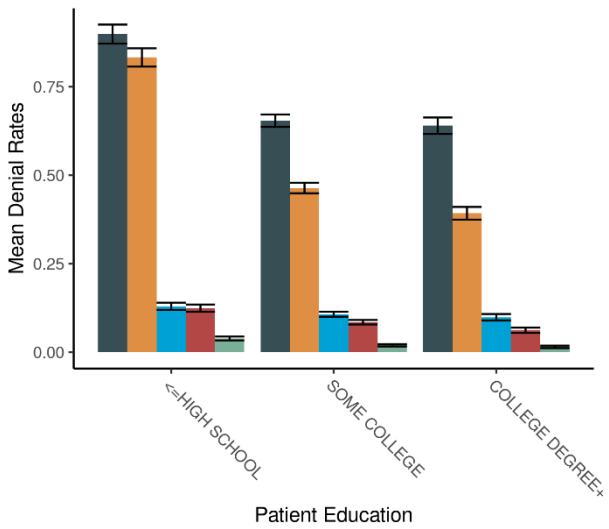

(b) Patient Education

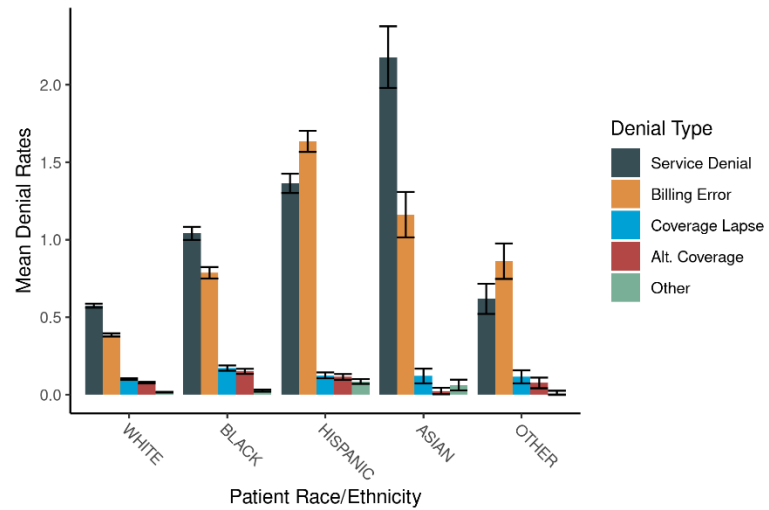

(c) Patient Race and Ethnicity
