# Supplementary material for: Social Determinants of Health and Insurance Claim Denials for Preventive Care
Source: PubMed Central journal article supplement (PMC11411384; doi:10.1001/jamanetworkopen.2024.33316), 2024-09-18
Supplement: jamanetwopen-e2433316-s002.pdf [file jamanetwopen-e2433316-s002.pdf]

## Data Sharing Statement

Hoagland. Social Determinants of Health and Insurance Claim Denials for Preventive Care. *JAMA Netw Open*. Published September 18, 2024. doi:10.1001/jamanetworkopen.2024.33316

### Data

**Data available:** No

### Additional Information

**Explanation for why data not available:** Data is proprietary to Symphony Health Solutions and will not be shared by the authors.
